# Supplementary material for: Oxidative etching of MoS2/WS2 nanosheets to their QDs by facile UV irradiation
Source: Royal Society of Chemistry journal article supplement (doi:10.1039/c6cp06748d), 2016-01-01
Supplement: c6cp06748d1.pdf [file c6cp06748d1.pdf]

## Supporting Information

### Oxidative etching MoS<sub>2</sub>/WS<sub>2</sub> nanosheets to their QDs by facile UV irradiation

Xiaolong Lu,<sup>a</sup> Rongguo Wang,<sup>\*a</sup> Lifeng Hao,<sup>a</sup> Fan Yang,<sup>a</sup> Weicheng Jiao,<sup>a</sup> Ping Peng,<sup>a</sup> Feng Yuan,<sup>a</sup> and Wenbo Liu<sup>\*b</sup>

<sup>a</sup> Center for Composite Materials and Structures, Harbin Institute of Technology, Harbin, 150080, China. Fax: +86-0451-86402399; Tel: +86-0451-86402399; E-mail: [wrg@hit.edu.cn](mailto:wrg@hit.edu.cn).

<sup>b</sup> School of Materials Science and Engineering, Harbin Institute of Technology, Harbin, 150001, China. E-mail: [liuwenbo@hit.edu.cn](mailto:liuwenbo@hit.edu.cn).

#### 1. Raman analysis of the nanosheets and QDs

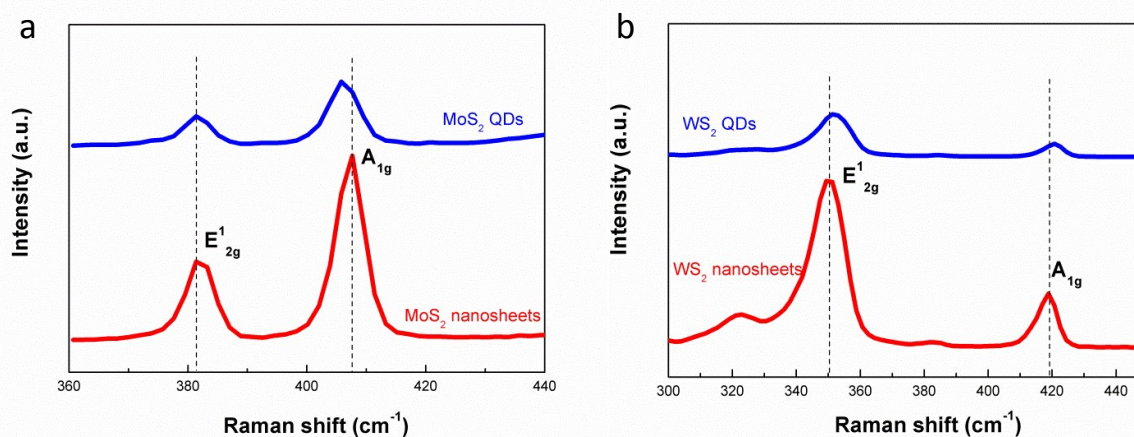

Fig. S1 The Raman spectra of MoS<sub>2</sub> (a) and WS<sub>2</sub> (b) nanosheets and corresponding QDs.

In Fig. S1 a, for the nanosheets of MoS<sub>2</sub> obtained after sonication, there are two first-order Raman active modes,<sup>1</sup> the A<sub>1g</sub> and the E<sup>1</sup><sub>2g</sub>, located at 407.7 and 381.4 cm<sup>-1</sup>, respectively. For their irradiated nanoparticles, the A<sub>1g</sub> peak red shifts in the order of 2 cm<sup>-1</sup>, indicating the thinning and exfoliation of nanosheets. On the spectra of WS<sub>2</sub> (Fig. S1 b), there are two intensive peaks corresponding to the A<sub>1g</sub> and E<sup>1</sup><sub>2g</sub> modes from out-of-plane and in-plane vibrations, respectively.<sup>2</sup> The two peaks both blue shift after downsizing to ultrasmall nanoparticles. The A<sub>1g</sub> peak shifts to 420.8 from 418.9 cm<sup>-1</sup>. While the E<sup>1</sup><sub>2g</sub> peak shifts to 352.2 from 349.4 cm<sup>-1</sup>. In the meantime, there is no identifiable peak corresponding to the oxides of molybdenum and tungsten in the Raman spectra. The Raman results further confirmed the as-prepared nanoparticles were the QDs of MoS<sub>2</sub>/WS<sub>2</sub>.

## 2. AFM measurements of QDs

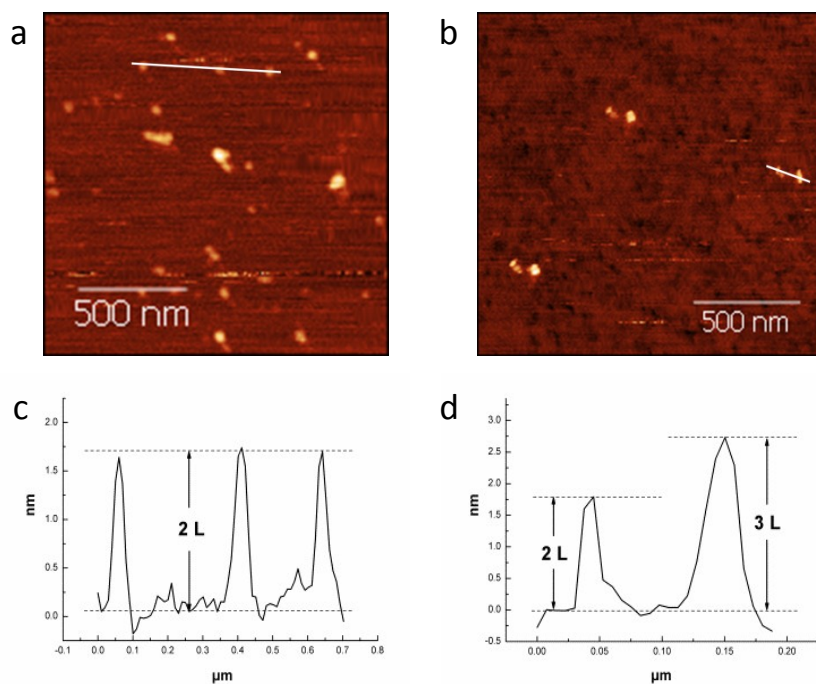

Fig. S2 The AFM images and their corresponding height profiles of the QDs of MoS<sub>2</sub> (a) (c) and WS<sub>2</sub> (b) (d).

Due to the fact that the height of monolayer MoS<sub>2</sub> and WS<sub>2</sub> is 0.8-1.0 nm,<sup>2,3</sup> all of the three measured heights of MoS<sub>2</sub> QDs correspond to 2 layers. While in the height profile of QDs of WS<sub>2</sub>, the measured heights correspond to 2 and 3 layers, respectively. The AFM results confirm the layered structure of the obtained QDs.

## 3. Contrast experiments conducted under higher power irradiation

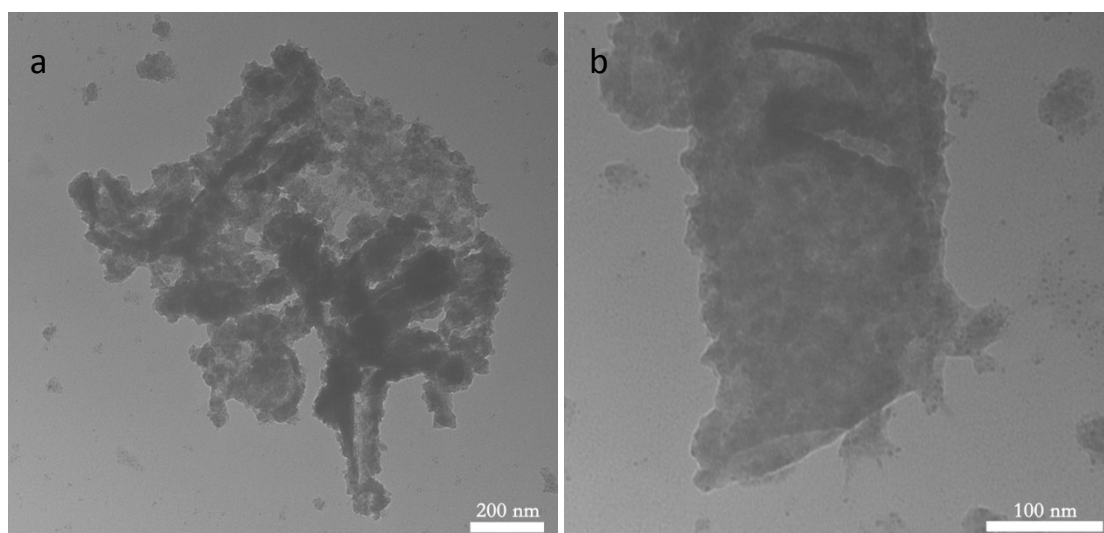

Fig. S3 TEM images of the etched nanosheets of MoS<sub>2</sub> under high power (125 W, ~17 mW/cm<sup>2</sup>) irradiation for 24 h. QDs could be seen in the vicinity of the etched nanosheets in (b).

---

#### 4. Contrast experiments conducted in ethanol/water

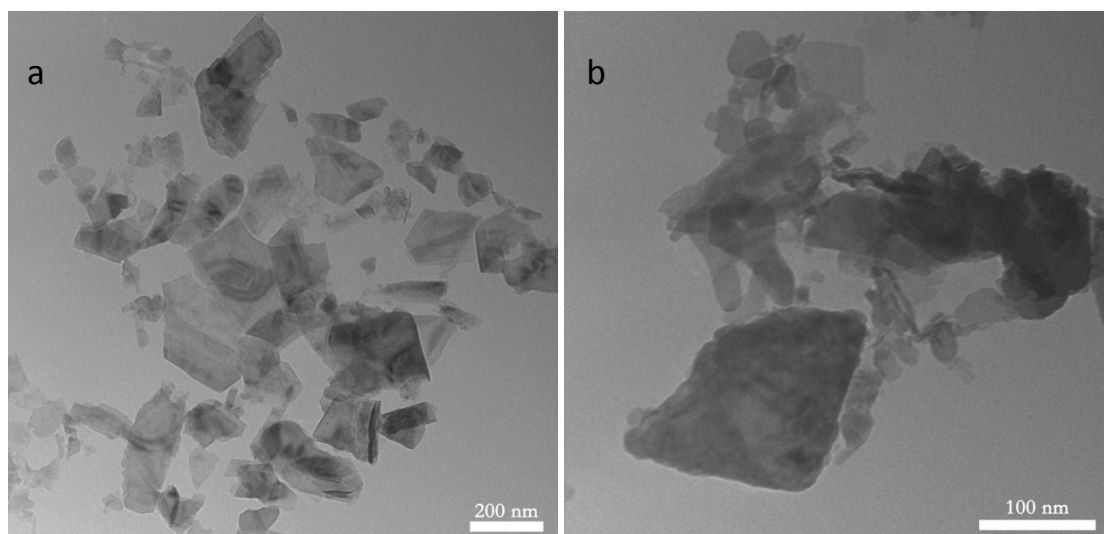

Fig. S4 TEM images of the nanosheets of MoS<sub>2</sub> (a) and WS<sub>2</sub> (b) in water/ethanol obtained after irradiation for 48 h. The morphologies of nanosheets are basically intact and no QDs are produced.

#### References

- 1 C. N. R. Rao, H. S. S. Ramakrishna Matte, and Urmimala Maitra. *Angew. Chem. Int. Ed.*, 2013, 52, 13162-13185.
- 2 Yinghan Yan, Cuiling Zhang, Wei Gu, *et al. J. Phys. Chem. C*, 2016, 120, 12170-12177.
- 3 L. Dong, S. Lin, L. Yang, *et al. Chem. Commun.*, 2014, 50, 15936-15939.
